# Supplementary material for: New vision on the mental problems of Vincent van Gogh; results from a bottom-up approach using (semi-)structured diagnostic interviews
Source: PubMed Central journal article supplement (PMC7604278; doi:10.1186/s40345-020-00196-z), 2020-11-02
Supplement: 40345_2020_196_MOESM1_ESM.pdf [file 40345_2020_196_MOESM1_ESM.pdf]

## Supplemental Tables

**Supplemental Table 1.** Overview of scores on relevant items of the SCID-IV: Screening module

| Nr. | SCREENING QUESTIONS                                                | ? | No | Ps | Pr | Yes | Source <sup>1</sup> |
|-----|--------------------------------------------------------------------|---|----|----|----|-----|---------------------|
| P1  | Ever 5 or more drinks/occasion?                                    |   |    |    |    | X   |                     |
| P2  | Ever used street drugs?                                            |   | X  |    |    |     |                     |
| P3  | Ever hooked on prescribed medicine or taken lot more?              |   | X  |    |    |     |                     |
| P4  | Ever had a panic attack?                                           |   |    | X  |    |     | 779                 |
| P5  | Ever afraid of going out the house alone?                          |   |    | X  |    |     |                     |
| P6  | Ever felt afraid or uncomfortable doing things in front of people? | X |    |    |    |     |                     |
| P7  | Ever nervous/anxious in social situations with unknown people?     |   |    |    | X  |     |                     |
| P8  | Ever afraid of special things/situations?                          |   | X  |    |    |     |                     |
| P9  | Ever bothered by senseless thoughts that are coming again?         |   | X  |    |    |     |                     |
| P10 | Ever doing things over and over again?                             |   | X  |    |    |     |                     |

No = certainly not present; Ps = possibly present; Pr = probably present; Yes = certainly present

<sup>1</sup> The numbers refer to the letters in Van Gogh's correspondence

**Supplemental Table 2.** Overview of scores on relevant items of the SCID-IV: Module mood disorders

| Nr.                        | DEPRESSIVE EPISODE                                                                                                   | ? | No | Ps | Pr | Yes | Source <sup>1</sup>                                        |
|----------------------------|----------------------------------------------------------------------------------------------------------------------|---|----|----|----|-----|------------------------------------------------------------|
| A1                         | Depressed mood                                                                                                       |   |    |    | X  |     | 221, 230, 241, 244, 390, 463, 672, 764, 815, 836, 874, 856 |
| A2                         | Diminished interest/pleasure                                                                                         |   |    |    |    | X   | 117, 141, 410, 776, 779, 804                               |
| A4                         | Significant weight loss / decreased appetite                                                                         |   |    |    |    | X   | 463                                                        |
| A5                         | Significant weight gain / increased appetite                                                                         | ? |    |    |    |     |                                                            |
| A7                         | Insomnia                                                                                                             |   |    |    |    | X   | 230, 410, 463, 735                                         |
| A8                         | Hypersomnia                                                                                                          |   |    | X  |    |     | 704                                                        |
| A10                        | Psychomotor retardation                                                                                              |   |    | X  |    |     | 611                                                        |
| A11                        | Psychomotor agitation                                                                                                | X |    |    |    |     |                                                            |
| A10                        | Fatigue/loss of energy                                                                                               |   |    |    |    | X   | 117, 410, 611, 764                                         |
| A11                        | Worthlessness or guilt                                                                                               |   |    |    |    | X   | 117, 764, 801, 831                                         |
| A12                        | Diminished thinking/concentration                                                                                    |   |    |    | X  |     | 611, 779, 815, 857, 864                                    |
| A13                        | Recurrent thoughts or death/suicide(-attempt)                                                                        |   |    |    |    | X   | 797, 833, July 27 1890                                     |
|                            | A1-A13: ≥5, incl. A1 or A2                                                                                           |   |    |    |    | X   |                                                            |
| A25                        | Significant distress/impairment                                                                                      |   |    |    |    | X   | 221, 230, 608, 864                                         |
| A15                        | Not substance related of medical                                                                                     |   |    |    | X  |     |                                                            |
| A16                        | Not bereavement                                                                                                      |   |    |    |    | X   |                                                            |
|                            | <b>Conclusion:</b><br>Depressive episodes                                                                            |   |    |    |    | X   |                                                            |
| <b>(HYPO)MANIC EPISODE</b> |                                                                                                                      |   |    |    |    |     |                                                            |
| Nr.                        | (HYPO)MANIC EPISODE                                                                                                  | ? | No | Ps | Pr | Yes | Source                                                     |
| A82                        | Elevated, expansive or irritable mood (≥1 week or ≥4 days)                                                           |   |    |    |    | X   | 592, 180-190 (all)                                         |
| A87                        | Inflated self-esteem/grandiosity                                                                                     |   |    | X  |    |     | 709                                                        |
| A88                        | Decreased need for sleep                                                                                             |   |    |    |    | X   | 676                                                        |
| A89                        | More talkative                                                                                                       | X |    |    |    |     |                                                            |
| A90                        | Flight of ideas                                                                                                      |   |    |    | X  |     | 180-190 (all)                                              |
| A91                        | Distractibility                                                                                                      | X |    |    |    |     |                                                            |
| A92                        | Increased goal-directed activity                                                                                     |   |    |    |    | X   | 155, 430, 592, 594, 666, 676, 709                          |
| A93                        | Excessive pleasurable but painful activities                                                                         |   |    | X  |    |     | 574                                                        |
|                            | A82-A 93: ≥3 incl. A82 = elevated/expansive or ≥4 incl. A82 = irritable                                              |   |    |    |    | X   |                                                            |
| A97                        | Marked impairment                                                                                                    |   |    | X  |    |     | 574, 592, 181-193 (all)                                    |
| A98                        | Not substance related of medical                                                                                     |   |    |    |    |     |                                                            |
|                            | <b>Conclusion:</b><br>- Manic episode(s)<br>- Hypomanic episode(s) (if not manic episodes)                           |   |    | X  |    | X   |                                                            |
|                            | <b>Overall Conclusion: Differential diagnosis</b><br>- Bipolar 1 disorder<br>- Bipolar 2 disorder (if not bipolar I) |   |    | X  |    | X   |                                                            |

No = certainly not present; Ps = possibly present; Pr = probably present; Yes = certainly present

<sup>1</sup> The numbers refer to the letters in Van Gogh's correspondence

**Supplemental Table 3.** Overview of scores on relevant items of the SCID-IV: Module psychotic disorders

| Nr.             | PSYCHOTIC SYMPTOMS                                                                                                                                                                                                                  | ? | No | Ps | Pr         | Yes        | Source <sup>1</sup>                                 |
|-----------------|-------------------------------------------------------------------------------------------------------------------------------------------------------------------------------------------------------------------------------------|---|----|----|------------|------------|-----------------------------------------------------|
| B1              | Delusion of reference                                                                                                                                                                                                               |   | X  |    |            |            |                                                     |
| B2              | Persecutory delusion                                                                                                                                                                                                                |   |    | X  |            |            | 747 (note 1)                                        |
| B3              | Grandiose delusion                                                                                                                                                                                                                  | X |    |    |            |            |                                                     |
| B4              | Somatic delusion                                                                                                                                                                                                                    | X |    |    |            |            |                                                     |
| B5              | Other delusion<br>- Poisoning delusion<br>- Religious delusion<br>- Guilt delusion                                                                                                                                                  |   |    | X  | X          | X          | - 747 (note 1)<br>- 801, 805<br>- 764, 801, 831     |
| B16             | Auditory hallucination                                                                                                                                                                                                              |   |    |    |            | X          | 743, 776, Dr Delon                                  |
| B19             | Visual hallucination                                                                                                                                                                                                                |   |    |    |            | X          | 739, 741, 776, 812                                  |
| B21             | Other hallucination                                                                                                                                                                                                                 |   | X  |    |            |            |                                                     |
| B24-<br>B28     | Catatonic behavior                                                                                                                                                                                                                  |   | X  |    |            |            |                                                     |
| B29             | Disorganized behavior                                                                                                                                                                                                               |   | X  |    |            |            |                                                     |
| B30             | Inadequate affect                                                                                                                                                                                                                   |   | X  |    |            |            |                                                     |
| B31             | Disorganized speech                                                                                                                                                                                                                 |   | X  |    |            |            |                                                     |
| B32-<br>B37     | Negative symptoms                                                                                                                                                                                                                   |   | X  |    |            |            |                                                     |
| C22-<br>C24     | Schizoaffective criteria                                                                                                                                                                                                            |   | X  |    |            |            |                                                     |
| C41-<br>C42     | Not associated with medical disorder<br>- porphyria                                                                                                                                                                                 |   |    |    |            | X          |                                                     |
|                 | Not associated with with<br>- substance intoxication<br>- alcohol<br>- other (e.g. absynth)<br>- substance withdrawal (e.g. delirium)<br>- alcohol<br>- other                                                                       | X |    | X  |            | X<br><br>X |                                                     |
| <b>DELIRIUM</b> |                                                                                                                                                                                                                                     |   |    |    |            |            |                                                     |
| Nr.             |                                                                                                                                                                                                                                     | ? | No | Ps | Pr         | Yes        |                                                     |
| NA              | Disturbance of consciousness                                                                                                                                                                                                        |   |    |    | X          |            | 797, 812                                            |
| NA              | Change in cognition                                                                                                                                                                                                                 |   |    |    | X          |            | 745, 812, FR b1055, FR b1057                        |
| NA              | Develops<br>- Within hours/days<br>- And fluctuates over the day                                                                                                                                                                    | X |    |    |            | X          | - 728, FR 1056                                      |
| NA              | Evidence that it developed<br>- During intoxication<br>- During or shortly after withdrawal                                                                                                                                         | X |    |    | X          |            |                                                     |
|                 | <b>Conclusion:</b><br>Delirium: all criteria yes                                                                                                                                                                                    |   |    |    | X          |            |                                                     |
|                 | <b>Overall Conclusion: Differential diagnosis</b><br>- Psychosis, e.g. schizophrenia or schizoaffective disorder<br>- Depressive episode(s) with psychotic features (July/August 1889)<br>- Deliriums (December 1888-February 1889) |   | X  |    | X<br><br>X |            | - 801, 805<br><br>- FR b1055<br>FR 1056<br>FR b1057 |

No = certainly not present; Ps = possibly present; Pr = probably present; Yes = certainly present; <sup>1</sup> The numbers refer to the letters in Van Gogh's correspondence

**Supplemental Table 4.** Overview of scores on relevant items of the SCID-IV: Module anxiety disorders

| Nr. | <b>PANIC DISORDER</b>                                      | ? | No | Ps | Pr | Yes | Source <sup>1</sup>      |
|-----|------------------------------------------------------------|---|----|----|----|-----|--------------------------|
| F1  | Recurrent unexpected panic attacks                         |   |    | X  |    |     | 230, 752, 753            |
| F2  | Persistent concern, worry implications, change in behavior |   |    | X  |    |     | 141, 702                 |
| F3  | Not better accounted for by another disorder               | X |    |    |    |     |                          |
|     | <b>Conclusion:</b><br>Not pursued                          |   |    |    |    |     |                          |
|     |                                                            |   |    |    |    |     |                          |
|     | <b>SOCIAL PHOBIA</b>                                       | ? | No | Ps | Pr | Yes | Source                   |
| F47 | Persistent fear                                            |   |    | X  |    |     |                          |
| F53 | Exposure provokes anxiety                                  |   |    | X  |    |     |                          |
| F54 | Fear is recognized excessive/unreasonable                  | X |    |    |    |     |                          |
| F55 | Feared situations are avoided                              |   |    | X  |    |     | 244                      |
| F56 | Interferes with person's normal routine                    |   |    | X  |    |     | London, 244 <sup>2</sup> |
| F57 | Duration ≥6 months                                         |   |    | X  |    |     |                          |
| F58 | Not substance related of medical                           |   |    |    |    | X   |                          |
| F59 | Not related to medical or other mental disorder            |   |    | X  |    |     | Depression <sup>3</sup>  |
|     | <b>Conclusion:</b><br>Social phobia (F47-59 yes)           |   |    | X  |    |     |                          |

No = certainly not present; Ps = possibly present; Pr = probably present; Yes = certainly present; <sup>1</sup> The numbers refer to the letters in Van Gogh's correspondence; <sup>2</sup> Especially during stay in London; <sup>3</sup> Possibly not related to depression

**Supplemental Table 5.** Overview of scores on relevant items of the SCID-IV: Module substance use disorders

| Nr. | ALCOHOL USE DISORDER                                       | ? | No | Ps | Pr | Yes | Source <sup>1</sup>    |
|-----|------------------------------------------------------------|---|----|----|----|-----|------------------------|
| E1  | Alcohol dependence likely                                  |   |    |    |    | X   |                        |
|     | Started with abuse<br>- 1883 (The Hague)<br>- 1886 (Paris) |   |    |    | X  | X   | 603                    |
| E2  | Use results in failure to fulfill major role               |   |    |    |    | X   | 750 (note7)            |
| E3  | Use in hazardous situations                                | X |    |    |    |     |                        |
| E4  | Use results in legal problems                              |   |    |    |    | X   | 750 (note7)            |
| E5  | Continues use despite problems                             |   |    |    | X  |     | 738, 752, 760, 764     |
|     | E2-E4: ≥1 yes                                              |   |    |    |    | X   |                        |
| E7  | More or longer use than intended                           |   |    |    | X  |     | 760                    |
| E8  | Persistent desire or unsuccessful efforts to end abuse     |   |    |    | X  |     |                        |
| E9  | Much time spent to obtain alcohol                          |   |    | X  |    |     |                        |
| E10 | Important social activities given up                       |   |    | X  |    |     |                        |
| E11 | Continues use despite problems                             |   |    |    |    | X   | 645, 694               |
| E12 | Tolerance                                                  |   |    |    | X  |     |                        |
| E13 | Withdrawal symptoms                                        |   |    |    | X  |     | 747 (note2) (delirium) |
|     | E7-E13: ≥3 yes within 12 months                            |   |    |    | X  |     |                        |
|     | <b>Conclusion:</b><br>Alcohol dependence                   |   |    |    | X  |     |                        |

No = certainly not present; Ps = possibly present; Pr = probably present; Yes = certainly present; <sup>1</sup> The numbers refer to the letters in Van Gogh's correspondence

**Supplemental Table 6.** Conclusions from questionnaires on personality disorders

| <b>Questionnaire</b>     | <b>Result/conclusion</b>                                                                                                                                                                                                                                                                                                                                                                                                  |
|--------------------------|---------------------------------------------------------------------------------------------------------------------------------------------------------------------------------------------------------------------------------------------------------------------------------------------------------------------------------------------------------------------------------------------------------------------------|
| Selftest 'De Viersprong' | Clear suggestions for a borderline personality disorder and/or an obsessive-compulsive personality disorder                                                                                                                                                                                                                                                                                                               |
| MSI-BPD                  | Positive on 8 of the 10 questions; a score of 7 or higher strongly suggests borderline personality disorder                                                                                                                                                                                                                                                                                                               |
| GAPD                     | Moderate to severe disfunction in self-pathology and severe maladaptation in interpersonal functioning, i.e. comparable to a level score of 2 and 3 respectively on the Personality Functioning Scale of the alternative DSM-5 model for personality disorder (DSM-5, part III)<br>The A-criterium is met, i.e. sufficiently high for the diagnosis/presence of a personality disorder according to the general criteria. |
| PID-5                    | Fits in a specific DSM-5, part III personality disorder, by scoring high on all criteria of a borderline personality disorder                                                                                                                                                                                                                                                                                             |
| Overall conclusion       | All questionnaires provide strong indications for a personality disorder, while the combination of the different traits convincingly point into the direction of a severe borderline personality disorder. There are also traits of an obsessive-compulsive personality disorder, however not in the compulsive, controlling sense but in the sense of a perseverative, rigid perfectionism.                              |

MSI-BPD: McLean Screening Instrument for Borderline Personality Disorder; GAPD: General Assessment of Personality Disorders; PID-5: Personality Inventory for DSM-5

**Supplemental Table 7.** Scores on the General Assessment of Personality Disorders (GAPD)

| Domains of the GAPD                        | Score | Compared with normals | Compared with patients with a personality disorder |
|--------------------------------------------|-------|-----------------------|----------------------------------------------------|
| Poorly delineated interpersonal boundaries | 2.45  | High                  | Average                                            |
| Lack of self clarity                       | 2.81  | High                  | Average                                            |
| Lack of history and continuity             | 3.11  | Very high             | Average                                            |
| Lack of autonomy and agency                | 3.92  | Very high             | High                                               |
| Impaired capacity intimacy/attachment      | 3.38  | Very high             | High                                               |
| Problems with affiliation                  | 3.20  | Very high             | High                                               |
| Disfunctioning of self                     | 2.97  | Very high             | Average                                            |
| Interpersonal dysfunction                  | 3.29  | Very high             | High                                               |
| Total score                                | 3.13  | Very high             | High                                               |

**Supplemental Table 8.** Scores on the individual items of the Personality Inventory for DSM-5 (PID-5)

| <b>Items of the PID-5</b>          | <b>Score</b> | <b>Compared with US normals</b> |
|------------------------------------|--------------|---------------------------------|
| Emotional lability <sup>1</sup>    | 2.42         | Very high                       |
| Anxiousness <sup>1</sup>           | 2.00         | High                            |
| Separation insecurity <sup>1</sup> | 2.14         | High                            |
| Submissiveness                     | 0.00         | Very low                        |
| Hostility <sup>1</sup>             | 1.90         | High                            |
| Perseveration                      | 1.77         | High                            |
| Depressivity <sup>1</sup>          | 1.43         | High                            |
| Suspiciousness                     | 1.17         | Average                         |
| Restricted affectivity             | 0.57         | Average                         |
| Withdrawal                         | 1.30         | Average                         |
| Intimacy avoidance                 | 1.00         | Average                         |
| Anhedonia                          | 0.88         | Average                         |
| Manipulativeness                   | 1.00         | Average                         |
| Deceitfulness                      | 0.30         | Average / low                   |
| Grandiosity                        | 0.33         | Average / low                   |
| Attention seeking                  | 1.13         | Average                         |
| Callousness                        | 1.07         | Average                         |
| Irresponsivity                     | 1.57         | High                            |
| Impulsivity <sup>1</sup>           | 1.83         | High                            |
| Distractibility                    | 0.55         | Average                         |
| Risk taking <sup>1</sup>           | 2.64         | Very high                       |
| Rigid perfectionism                | 1.10         | Average                         |
| Unusual beliefs and experiences    | 0.13         | Average / low                   |
| Eccentricity                       | 0.77         | Average                         |
| Perceptual dysregulation           | 0.17         | Average / low                   |
|                                    |              |                                 |
| <b>Domains of the PID-5</b>        | <b>Score</b> | <b>Compared with US normals</b> |
| Negative Affectivity               | 2.18         | Very high                       |
| Detachment                         | 1.06         | Average / high                  |
| Antagonism                         | 0.53         | Low                             |
| Disinhibition                      | 1.32         | Average / high                  |
| Psychoticism                       | 0.36         | Low                             |

<sup>1</sup> Criteria of borderline personality disorder



**Supplemental table 9.** Neuropsychiatric history of Van Gogh

| <b>Time</b>                      | <b>Symptomatology</b>                                                                                                                                                                                                                                                                                                                                                                                                                                                          | <b>Letter <sup>1</sup></b> |
|----------------------------------|--------------------------------------------------------------------------------------------------------------------------------------------------------------------------------------------------------------------------------------------------------------------------------------------------------------------------------------------------------------------------------------------------------------------------------------------------------------------------------|----------------------------|
| From about 1873                  | <ul style="list-style-type: none"> <li>- Depressive mood changes</li> <li>- Maladjusted behavior, visits to brothels</li> <li>- Lifestyle problems in sleeping, eating, use of alcohol and tobacco</li> </ul>                                                                                                                                                                                                                                                                  |                            |
| 1878 (Amsterdam)                 | <ul style="list-style-type: none"> <li>- Hyperreligiosity, Self-flagellation</li> </ul>                                                                                                                                                                                                                                                                                                                                                                                        |                            |
| 1879-1880 (Borinage)             | <ul style="list-style-type: none"> <li>- Self-neglect, active melancholy</li> <li>- Consultation of Ramaer (neuropsychiatrist) by his parents considering admission in asylum of Geel (Belgium)</li> <li>- Sometimes facial tics</li> </ul>                                                                                                                                                                                                                                    | 155                        |
| 1882 (The Hague)                 | <ul style="list-style-type: none"> <li>- Nervous exhaustion, sleeplessness, headache</li> </ul>                                                                                                                                                                                                                                                                                                                                                                                |                            |
| 1886-1888 (Paris)                | <ul style="list-style-type: none"> <li>- Increased abuse of alcohol</li> <li>- Exhaustion, dazed, feels dizzy and paralyzed</li> <li>- Nightmares</li> <li>- Periods of uncontrolled behavior</li> </ul>                                                                                                                                                                                                                                                                       |                            |
| 1888 (Arles):                    | <ul style="list-style-type: none"> <li>- Attacks mentioned in various terms</li> <li>- Melancholy</li> <li>- Unaccountable, involuntary feelings</li> <li>- Stupor on some days</li> <li>- Sleepwalking</li> </ul>                                                                                                                                                                                                                                                             | 628<br>615                 |
| December 1888-April 1890 (Arles) | <ul style="list-style-type: none"> <li>- Seven (sub)acute episodes with variable combinations of symptomatology                             <ul style="list-style-type: none"> <li>o Disturbance of memory and consciousness</li> <li>o Confusion</li> <li>o Anxiety</li> <li>o Exaltation</li> <li>o Visual and auditory hallucinations</li> <li>o Nightmares</li> <li>o Delusions</li> <li>o Depressions</li> <li>o Prosopagnosia and spatial agnosia</li> </ul> </li> </ul> | 812                        |
| 1890 (Auvers)                    | <ul style="list-style-type: none"> <li>- Suicide attempt</li> </ul>                                                                                                                                                                                                                                                                                                                                                                                                            |                            |

<sup>1</sup> The numbers refer to the letters in Van Gogh's correspondence

**Supplemental table 10.** Neuropsychiatric family history of Van Gogh <sup>1</sup>

| <b>Family member</b>                   | <b>Relationship</b> | <b>Diagnosis/symptomatology</b>                                                      |
|----------------------------------------|---------------------|--------------------------------------------------------------------------------------|
| Theo van Gogh<br>(1857-1891)           | Brother             | - Dementia paralytica<br>- Two seizures in his last two days                         |
| Wilhelmina van Gogh<br>(1862-1941)     | Sister              | - Schizoaffective disorder, depressive type<br>- Dementia                            |
| Cor van Gogh<br>(1867-1900)            | Brother             | - Probably suicide                                                                   |
| Clara Adriana Carbentus<br>(1817-1866) | Mother's sister     | - Seizures from age 34 (1851)                                                        |
| Hendrik van Gogh<br>(1853-1866)        | Cousin              | - Attacks from age 31 (1884)<br>- Dies after dropping out of a boat at age 33 (1886) |

<sup>1</sup> Voskuil P, Diagnosing Vincent van Gogh, an expedition from the sources to the present "mer à boire". *Epilepsy Behav.* 2013; 28:177-80.

**Supplemental table 11. Arguments pro and contra epilepsy as a possible diagnosis in Van Gogh's case**

|   | <b>Arguments pro</b>                                                                                                                                                                                                                                                                                                                                                                                                                                                                                                                                                                                                                                                                                                                                                                                                                                                                                                                                                                                                                                                                                                                                                                                                                                                                                                                                                                                                                                                                                                                                                                                  | <b>Letter <sup>1</sup>/reference</b>                                                                                                                                           |
|---|-------------------------------------------------------------------------------------------------------------------------------------------------------------------------------------------------------------------------------------------------------------------------------------------------------------------------------------------------------------------------------------------------------------------------------------------------------------------------------------------------------------------------------------------------------------------------------------------------------------------------------------------------------------------------------------------------------------------------------------------------------------------------------------------------------------------------------------------------------------------------------------------------------------------------------------------------------------------------------------------------------------------------------------------------------------------------------------------------------------------------------------------------------------------------------------------------------------------------------------------------------------------------------------------------------------------------------------------------------------------------------------------------------------------------------------------------------------------------------------------------------------------------------------------------------------------------------------------------------|--------------------------------------------------------------------------------------------------------------------------------------------------------------------------------|
| 1 | Minor equivalents of focal seizures with impaired awareness<br>Some examples as mentioned in Van Gogh's letters <ul style="list-style-type: none"> <li>- "Repeated and unexpected emotions"</li> <li>- "Moments of anguish – above all – in my so-called mental illness"</li> <li>- "Terrible fits of anxiety sometimes – without any apparent cause – or then again a feeling of emptiness and fatigue in the mind"</li> </ul>                                                                                                                                                                                                                                                                                                                                                                                                                                                                                                                                                                                                                                                                                                                                                                                                                                                                                                                                                                                                                                                                                                                                                                       | Gastaut <sup>2</sup><br><br>751<br>752<br>764                                                                                                                                  |
| 2 | Three 'crises' in 1889 allegedly witnessed by his guards, taken down years later by third parties<br><br>First 'crisis': Possible focal seizure with impaired awareness evolving to bilateral tonic-clonic seizure <ul style="list-style-type: none"> <li>- There was a clear 'crisis' on or around July 16</li> <li>- It started sudden and unexpected as written by Van Gogh</li> <li>- According to Trabuc, Van Gogh had a contorted hand and looked haggard before falling on the ground</li> <li>- Gastaut mentions no source and there is no other account like this</li> </ul> Second 'crisis': Possible focal seizure with impaired awareness <ul style="list-style-type: none"> <li>- "An odd thing happened one day. Van Gogh and Poulet were coming back from an outing; they were just going up the stairs, when Vincent, who was in front, suddenly turned round and gave Poulet an almighty kick in the stomach. Poulet, who was used to the odd habits of the asylum inmates, said nothing about it.</li> <li>- Next day Vincent said: "Yesterday, chief, I swung a kick at you. Please forgive me, I had the Arles police after me"</li> </ul> Third 'crisis': Possible focal seizure evolving to bilateral tonic-clonic seizure <ul style="list-style-type: none"> <li>- "Another day, when he went to fetch Vincent for dinner, Poulet found him with staring eyes and foaming lips: Vincent had been trying to eat his paints. Three tubes of them! Dr Peyron and Trabu [sic]... and Poulet only just managed to save him. This was not the only incident of the kind."</li> </ul> | <br><br><br>797<br>Trabuc as mentioned in Gastaut <sup>2</sup><br><br><br>Interview of Poulet in Tralbaut <sup>3</sup><br><br><br>Interview of Poulet in Tralbaut <sup>3</sup> |
| 3 | Parts of the prolonged episodes between December 1888 and April 1890 are to some extent similar to what can be seen in limbic ictal psychosis: disturbance of consciousness, agitation, anxiety, visual and auditory hallucinations, delusions (of being persecuted or poisoned)                                                                                                                                                                                                                                                                                                                                                                                                                                                                                                                                                                                                                                                                                                                                                                                                                                                                                                                                                                                                                                                                                                                                                                                                                                                                                                                      |                                                                                                                                                                                |
| 4 | Some characteristics of the Gastaut-Waxman-Geschwind syndrome prominent in the personality of Van Gogh: hyperreligiosity, hypergraphia and tendency to elation                                                                                                                                                                                                                                                                                                                                                                                                                                                                                                                                                                                                                                                                                                                                                                                                                                                                                                                                                                                                                                                                                                                                                                                                                                                                                                                                                                                                                                        |                                                                                                                                                                                |
| 5 | Family history of epilepsy                                                                                                                                                                                                                                                                                                                                                                                                                                                                                                                                                                                                                                                                                                                                                                                                                                                                                                                                                                                                                                                                                                                                                                                                                                                                                                                                                                                                                                                                                                                                                                            |                                                                                                                                                                                |
|   | <b>Arguments contra</b>                                                                                                                                                                                                                                                                                                                                                                                                                                                                                                                                                                                                                                                                                                                                                                                                                                                                                                                                                                                                                                                                                                                                                                                                                                                                                                                                                                                                                                                                                                                                                                               |                                                                                                                                                                                |
| 1 | The testimonies mentioned under Pro 2. can be questioned <ul style="list-style-type: none"> <li>- Gastaut does not mention a source for Trabuc's account</li> <li>- Correspondence between Voskuil and Gastaut (1988) reveals that Gastaut had lost his documentation</li> <li>- Tralbaut interviewed Poulet when he was 90 years old.</li> </ul>                                                                                                                                                                                                                                                                                                                                                                                                                                                                                                                                                                                                                                                                                                                                                                                                                                                                                                                                                                                                                                                                                                                                                                                                                                                     |                                                                                                                                                                                |
| 2 | There are no indications that other focal impaired awareness or bilateral tonic-clonic seizures ever have taken place                                                                                                                                                                                                                                                                                                                                                                                                                                                                                                                                                                                                                                                                                                                                                                                                                                                                                                                                                                                                                                                                                                                                                                                                                                                                                                                                                                                                                                                                                 |                                                                                                                                                                                |
| 3 | The duration of an un-interrupted period of symptoms within the seven prolonged intermitting episodes is not known                                                                                                                                                                                                                                                                                                                                                                                                                                                                                                                                                                                                                                                                                                                                                                                                                                                                                                                                                                                                                                                                                                                                                                                                                                                                                                                                                                                                                                                                                    |                                                                                                                                                                                |
| 4 | In the family history interpretation from sources is, with some exceptions, ambiguous                                                                                                                                                                                                                                                                                                                                                                                                                                                                                                                                                                                                                                                                                                                                                                                                                                                                                                                                                                                                                                                                                                                                                                                                                                                                                                                                                                                                                                                                                                                 |                                                                                                                                                                                |

<sup>2</sup> Gastaut H. La maladie de Vincent van Gogh envisagée de la lumière des conceptions nouvelles sur l'épilepsie psychomotrice [Vincent van Gogh's disease seen in the light of new concepts of psychomotor epilepsy]. Ann Med Psychol (Paris). 1956; 2: 1-43.

<sup>3</sup> Tralbaut ME. Vincent van Gogh. Edita Lausanne; 1974: 288-90.
